# Supplementary material for: Fe and Mn mixed oxide catalysts supported on Sn-modified TiO2 for the selective catalytic reduction of NO with NH3 at low temperature
Source: Royal Society of Chemistry journal article supplement (doi:10.1039/d1nj05290j), 2021-12-24
Supplement: d1nj05290j1.pdf [file d1nj05290j1.pdf]

**Fe and Mn mixed oxide catalysts supported on Sn-modified TiO<sub>2</sub> for selective  
catalytic reduction of NO with NH<sub>3</sub> at low temperature**

Zhitao Han<sup>a†</sup>, Huan Du<sup>b‡</sup>, Duo Xu<sup>a</sup>, Yu Gao<sup>a</sup>, Shaolong Yang<sup>c</sup>, Liguo Song<sup>a</sup>, Jingming Dong<sup>a</sup>,

Xinxiang Pan<sup>a,d</sup>

a. Marine Engineering College, Dalian Maritime University, Dalian 116026, China;

b. China Waterborne Transport Research Institute, Beijing 100088, China;

c. School of Naval Architecture and Ocean Engineering, Huazhong University of Science and  
Technology, Wuhan 430074, China;

d. School of Electronic and Information Technology, Guangdong Ocean University, Zhanjiang  
524088, China.

Correspondence information: Dr. Zhitao Han, Dalian Maritime University, No.1, Linghai Road,  
Dalian 116026, China, hanzt@dlmu.edu.cn, +86 411 8472 3321; Dr. Huan Du, China Waterborne  
Transport Research Institute, Beijing 100088, China, duhuan@wti.ac.cn, +86 010 6529 0511.

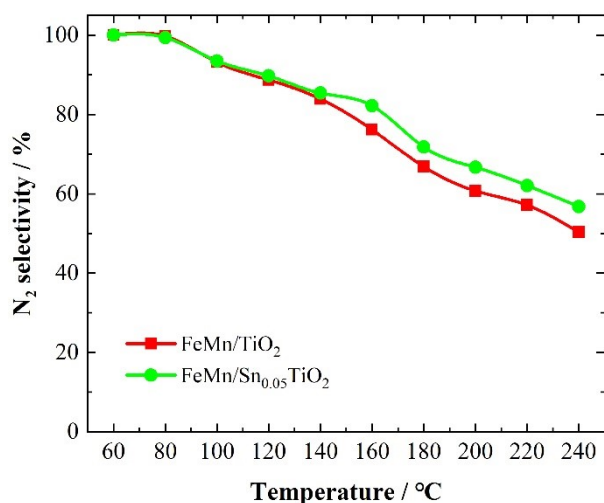

**Fig. S1.** N<sub>2</sub> selectivities in NH<sub>3</sub>-SCR reactions over FeMn/TiO<sub>2</sub> and FeMn/Sn<sub>0.05</sub>TiO<sub>2</sub> catalysts (Reaction conditions: 1 mL catalyst, [NO] = [NH<sub>3</sub>] = 600 ppm, [O<sub>2</sub>] = 5 vol.%, balanced with N<sub>2</sub>, GSHV = 30,000 h<sup>-1</sup>).

### SEM and EDS

The samples of TiO<sub>2</sub>, Sn<sub>0.05</sub>TiO<sub>2</sub>, FeMn/TiO<sub>2</sub> and FeMn/Sn<sub>0.05</sub>TiO<sub>2</sub> were characterized by SEM, and the results were illustrated in Fig. S2. As shown in Fig. S2(a,b), the surface morphology of Sn-modified TiO<sub>2</sub> was more uniform compared with that of pristine TiO<sub>2</sub>. As to FeMn/TiO<sub>2</sub> and FeMn/Sn<sub>0.05</sub>TiO<sub>2</sub> catalysts, there were no obvious differences in surface morphology observed from the SEM images. The nanoparticles dispersed well, and were uniform in size. It indicated that the introduction of Sn in TiO<sub>2</sub> support imposed little effect on the surface morphology of the prepared catalysts.

The distribution and contents of the elements in the prepared supports and catalysts were evaluated by EDS. The EDS spectra were shown in Fig. S3 and the calculated surface element contents were summarized in Tab. S1. From the EDS spectra of Sn<sub>0.05</sub>TiO<sub>2</sub> support and FeMn/Sn<sub>0.05</sub>TiO<sub>2</sub> catalyst, obvious Sn peaks could be observed, which confirmed that transition metal element Sn had been successfully introduced in TiO<sub>2</sub> supports. As shown in Tab. S1, the atomic percentages of Sn and Ti elements on

the surface of  $\text{FeMn}/\text{Sn}_{0.05}\text{TiO}_2$  catalyst were 0.52 % and 10.43 %, respectively, resulting in a calculated molar ratio of  $\text{Sn}/\text{Ti}$  was 0.05. This result was very consistent with the design value in preparation process. It implied that the distribution of Sn element in the support of  $\text{FeMn}/\text{Sn}_{0.05}\text{TiO}_2$  catalyst was very uniform.

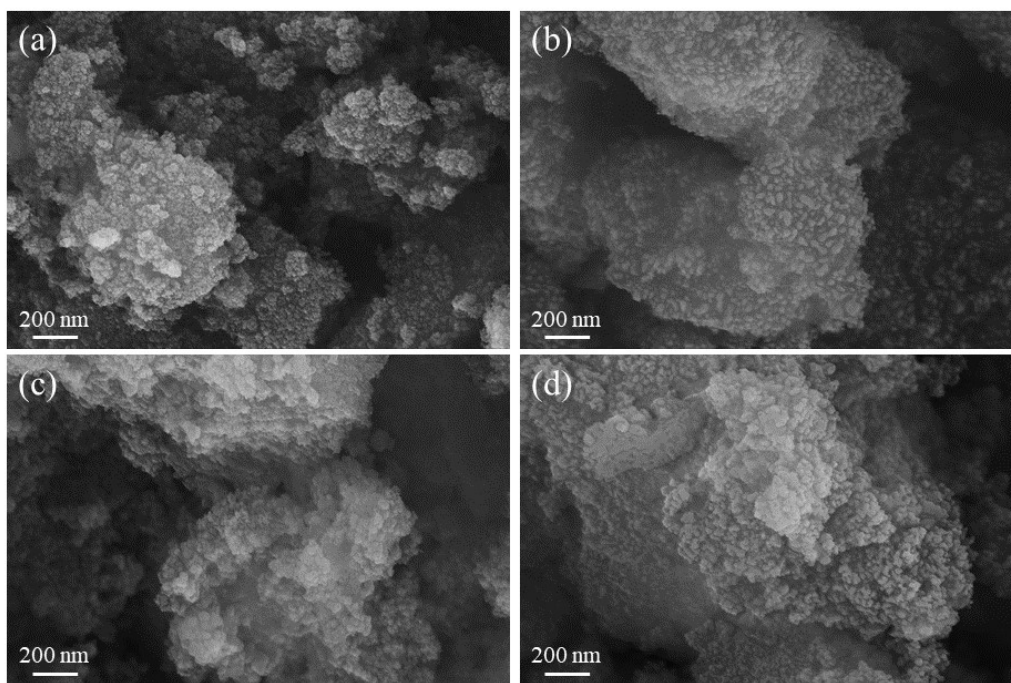

**Fig. S2.** FESEM images of (a)  $\text{TiO}_2$ , (b)  $\text{Sn}_{0.05}\text{TiO}_2$ , (c)  $\text{FeMn}/\text{TiO}_2$  and (d)  $\text{FeMn}/\text{Sn}_{0.05}\text{TiO}_2$

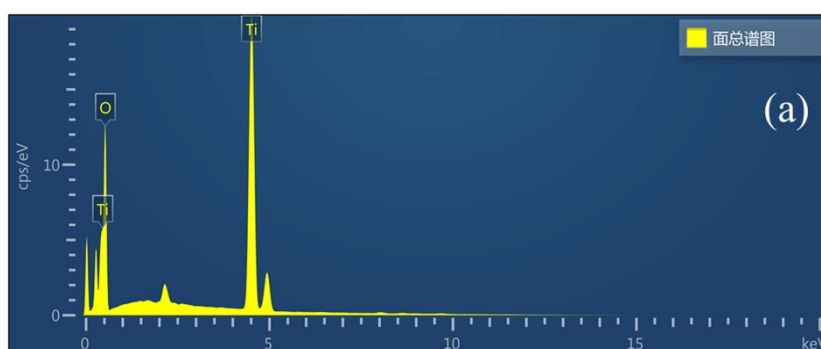

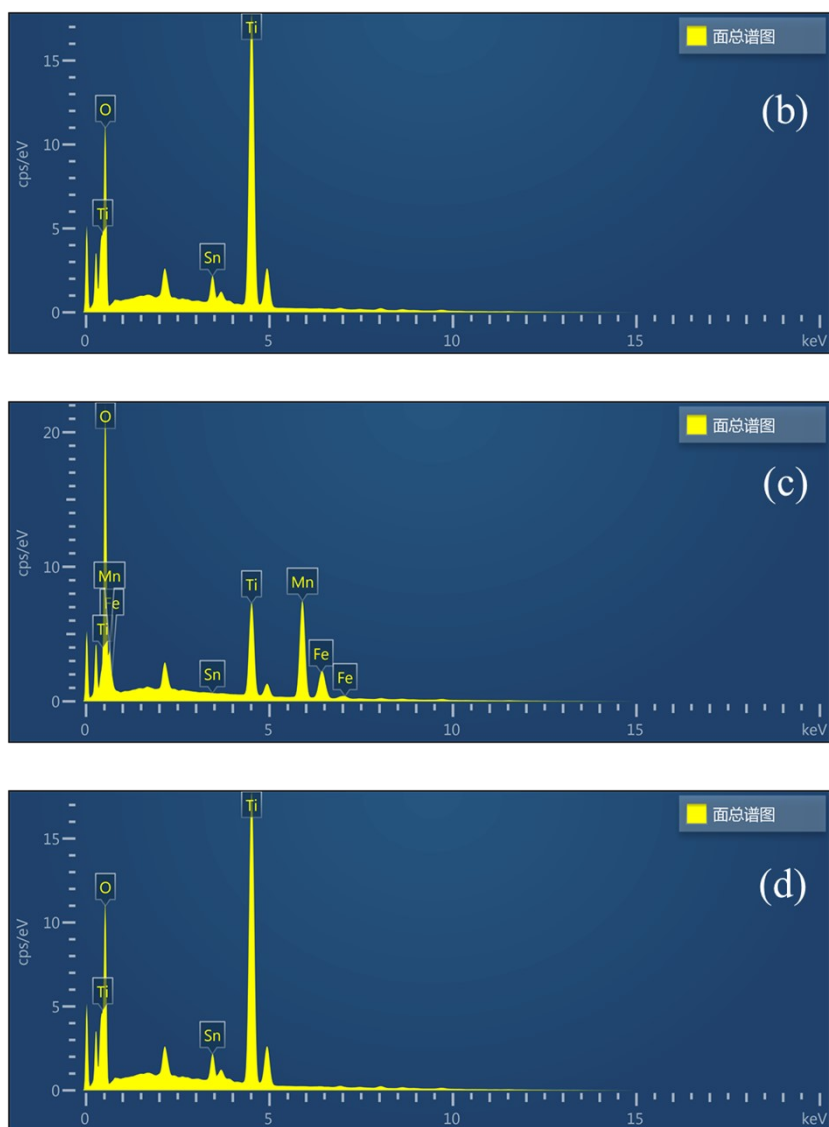

**Fig. S3.** EDS pictures of (a) TiO<sub>2</sub>, (b) Sn<sub>0.05</sub>TiO<sub>2</sub>, (c) FeMn/TiO<sub>2</sub> and (d) FeMn/Sn<sub>0.05</sub>TiO<sub>2</sub>

### NH<sub>3</sub>-TPD

NH<sub>3</sub>-TPD tests were performed to investigate the influence of Sn doping in TiO<sub>2</sub> on the surface acidity of the prepared catalysts. NH<sub>3</sub>-TPD profiles of FeMn/TiO<sub>2</sub> and FeMn/Sn<sub>0.05</sub>TiO<sub>2</sub> catalysts were shown in Fig. S4. There were two obvious desorption peaks in NH<sub>3</sub>-TPD spectra of both catalysts. The desorption peaks in the low-temperature region (< 250 °C) belonged to the weak acid sites, while the desorption peaks in the high-temperature region (> 250 °C) belonged to the strong acid sites.

Comparatively speaking, the desorption peak area of FeMn/Sn<sub>0.05</sub>TiO<sub>2</sub> catalyst was obviously larger than that of FeMn/TiO<sub>2</sub> catalyst. It indicated that the strengths of both weak acid sites and strong acid sites over Sn-modified FeMn/TiO<sub>2</sub> catalyst had been distinctively enhanced. Yao et al. reported that the enhancement of weak acid sites was helpful to promote the low-temperature activity of SCR catalysts [1]. The results demonstrated that the introduction of Sn in TiO<sub>2</sub> support could promote the strength of weak acid sites on catalyst surface, thus improving the SCR activity of FeMn/TiO<sub>2</sub> catalysts at low temperature.

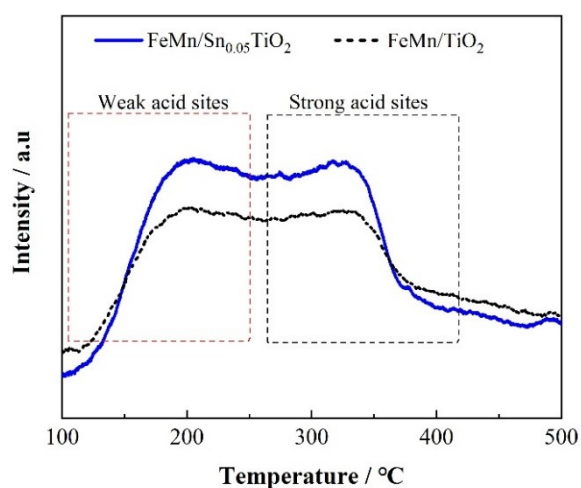

**Fig. S4.** NH<sub>3</sub>-TPD profiles of FeMn/TiO<sub>2</sub> and FeMn/Sn<sub>0.05</sub>TiO<sub>2</sub> catalysts

**Tab. S1.** Surface element contents of the prepared supports and catalysts

| Sample                                   |                  | O     | Ti    | Mn    | Fe   | Sn   | Total |
|------------------------------------------|------------------|-------|-------|-------|------|------|-------|
| TiO <sub>2</sub>                         | wt (%)           | 42.73 | 57.27 | 0     | 0    | 0    | 100   |
|                                          | atomic ratio (%) | 69.08 | 30.92 | 0     | 0    | 0    | 100   |
| Sn <sub>0.05</sub> TiO <sub>2</sub>      | wt (%)           | 40.59 | 53.09 | 0     | 0    | 6.32 | 100   |
|                                          | atomic ratio (%) | 68.60 | 29.97 | 0     | 0    | 1.44 | 100   |
| FeMn/TiO <sub>2</sub>                    | wt (%)           | 32.86 | 19.02 | 39.16 | 8.96 | 0    | 100   |
|                                          | atomic ratio (%) | 61.78 | 11.96 | 21.45 | 4.83 | 0    | 100   |
| FeMn/Sn <sub>0.05</sub> TiO <sub>2</sub> | wt (%)           | 28.17 | 15.43 | 46.17 | 8.34 | 1.89 | 100   |
|                                          | atomic ratio (%) | 57.01 | 10.43 | 27.21 | 4.84 | 0.52 | 100   |

**Tab.S2.** Textural properties of the prepared supports and catalysts

| Catalyst                                    | Specific surface area (m <sup>2</sup> /g) | Pore volume (cm <sup>3</sup> /g) | Pore size (nm) |
|---------------------------------------------|-------------------------------------------|----------------------------------|----------------|
| TiO <sub>2</sub>                            | 75.6                                      | 0.18                             | 6.8            |
| Sn <sub>0.01</sub> TiO <sub>2</sub>         | 78.9                                      | 0.18                             | 6.3            |
| Sn <sub>0.05</sub> TiO <sub>2</sub>         | 62.0                                      | 0.16                             | 7.4            |
| Sn <sub>0.1</sub> TiO <sub>2</sub>          | 80.7                                      | 0.18                             | 6.7            |
| Sn <sub>0.2</sub> TiO <sub>2</sub>          | 108.2                                     | 0.20                             | 5.3            |
| FeMn/TiO <sub>2</sub>                       | 53.6                                      | 0.14                             | 7.6            |
| FeMn/Sn <sub>0.01</sub> TiO <sub>2</sub>    | 62.4                                      | 0.16                             | 7.5            |
| FeMn/Sn <sub>0.05</sub> TiO <sub>2</sub>    | 53.6                                      | 0.15                             | 8.1            |
| FeMn/Sn <sub>0.1</sub> TiO <sub>2</sub>     | 59.3                                      | 0.15                             | 7.5            |
| FeMn/Sn <sub>0.2</sub> TiO <sub>2</sub>     | 71.7                                      | 0.16                             | 6.5            |
| FeMn/TiO <sub>2</sub> -S                    | 48.0                                      | 0.19                             | 10.9           |
| FeMn/Sn <sub>0.05</sub> TiO <sub>2</sub> -S | 50.3                                      | 0.15                             | 8.8            |

**Tab. S3.** Reduction temperatures and H<sub>2</sub> consumption values of FeMn/TiO<sub>2</sub> and FeMn/Sn<sub>0.05</sub>TiO<sub>2</sub> catalysts before and after SO<sub>2</sub> resistance tests

| Catalyst                                    | Peak temperature (°C) |        |        | H <sub>2</sub> consumption<br>(cm <sup>3</sup> /g STP) |
|---------------------------------------------|-----------------------|--------|--------|--------------------------------------------------------|
|                                             | Peak-1                | Peak-2 | Peak-3 |                                                        |
| FeMn/TiO <sub>2</sub>                       | 323                   | 421    | 479    | 161.6                                                  |
| FeMn/Sn <sub>0.05</sub> TiO <sub>2</sub>    | 323                   | 429    | 687    | 245.4                                                  |
| FeMn/TiO <sub>2</sub> -S                    | 361                   | 459    | 652    | 216.6                                                  |
| FeMn/Sn <sub>0.05</sub> TiO <sub>2</sub> -S | 359                   | 4354   | 486    | 261.5                                                  |

**Tab. S4.** Surface atomic ratios of FeMn/TiO<sub>2</sub> and FeMn/Sn<sub>0.05</sub>TiO<sub>2</sub> catalysts before and after SO<sub>2</sub> resistance tests

| Catalyst                                 | Mn (%) | Fe (%) | O (%) | Ti (%) | S (%) | N (%) | Mn <sup>4+</sup> /Mn <sup>n+</sup> (%) | O <sub>α</sub> /(O <sub>β</sub> + O <sub>α</sub> ) (%) |
|------------------------------------------|--------|--------|-------|--------|-------|-------|----------------------------------------|--------------------------------------------------------|
| FeMn/TiO <sub>2</sub>                    | 14.26  | 4.76   | 45.56 | 5.55   | -     | -     | 27.2                                   | 23.9                                                   |
| FeMn/Sn <sub>0.05</sub> TiO <sub>2</sub> | 12.85  | 4.44   | 46.67 | 7.34   | -     | -     | 30.8                                   | 26.4                                                   |
| FeMn/TiO <sub>2</sub> -S                 | 16.16  | 4.93   | 49.28 | 3.96   | 2.12  | 1.83  | 28.3                                   | 25.7                                                   |
| FeMn/Sn <sub>0.05</sub> TiO <sub>2</sub> | 13.11  | 4.89   | 50.65 | 7.67   | 1.93  | 1.68  | 40.8                                   | 33.7                                                   |

**Tab. S5.** Comparison of some reported FeMn/TiO<sub>2</sub> catalysts in terms of NO conversion efficiencies and SO<sub>2</sub> resistance

| Catalysts                                | Reaction condition                                                                                                                              | NO conversion     | SO <sub>2</sub> resistance | Reference |
|------------------------------------------|-------------------------------------------------------------------------------------------------------------------------------------------------|-------------------|----------------------------|-----------|
| FeMn/Sn <sub>0.05</sub> TiO <sub>2</sub> | NO = NH <sub>3</sub> = 600 ppm, O <sub>2</sub> = 5%,<br>GHSV = 30000 h <sup>-1</sup> , flow rate 500<br>mL/min, SO <sub>2</sub> = 100 ppm (when | 95.9%<br>(@100°C) | 84.4%<br>(@200°C, 3 h)     | This work |

| Catalysts                 | Reaction condition                                                                                                                                                                         | NO conversion    | SO <sub>2</sub> resistance   | Reference |
|---------------------------|--------------------------------------------------------------------------------------------------------------------------------------------------------------------------------------------|------------------|------------------------------|-----------|
|                           | <b>used)</b>                                                                                                                                                                               |                  |                              |           |
| FeMn/TiO <sub>2</sub>     | NO = NH <sub>3</sub> = 1000 ppm, O <sub>2</sub> = 3%,<br>GHSV = 20000 h <sup>-1</sup> , flow rate 2 L/min,<br>catalyst 4 mL, SO <sub>2</sub> = 200 ppm (when<br>used)                      | 100%<br>(@150°C) | 80%<br>(@150°C, 35 min)      | [2]       |
| FeMn/TiO <sub>2</sub>     | NO = NH <sub>3</sub> = 600 ppm, O <sub>2</sub> = 3%,<br>GHSV = 50000 h <sup>-1</sup> , flow rate 300<br>mL/min, SO <sub>2</sub> = 100 ppm (when used),<br>H <sub>2</sub> O = 3%(when used) | 65%<br>(@100 °C) | 84%<br>(@180 °C, 5 h)        | [3]       |
| FeMn/TiO <sub>2</sub>     | NO = NH <sub>3</sub> = 1000 ppm, O <sub>2</sub> = 2%,<br>catalyst 2.5 g, flow rate 100 mL/min                                                                                              | 88%<br>(@100 °C) | No data                      | [4]       |
| HoFeMn/TiO <sub>2</sub>   | NO = NH <sub>3</sub> = 0.08%, O <sub>2</sub> = 5%, GHSV<br>= 20000 h <sup>-1</sup> , flow rate 100 mL/min,<br>SO <sub>2</sub> = 200 ppm (when used), H <sub>2</sub> O =<br>15% (when used) | 85%<br>(@100 °C) | 80%<br>(@120 °C, 4h)         | [5]       |
| PrFeMn/TiO <sub>2</sub>   | NO = NH <sub>3</sub> = 1000 ppm, O <sub>2</sub> = 7%,<br>GHSV = 30000 h <sup>-1</sup> , flow rate 1 L/min,<br>SO <sub>2</sub> = 100 ppm (when used)                                        | 85<br>(@120 °C)  | 95%<br>(@200 °C, 3h)         | [6]       |
| FeCoMnCe/TiO <sub>2</sub> | NO = NH <sub>3</sub> = 500 ppm, O <sub>2</sub> = 6%,<br>GHSV = 12000 h <sup>-1</sup> , flow rate 400<br>mL/min, SO <sub>2</sub> = 200 ppm (when used)                                      | 85%<br>(@100 °C) | 96%<br>(@200 °C, 7h)         | [7]       |
| Mn/Fe-Ti                  | NO = NH <sub>3</sub> = 500 ppm, O <sub>2</sub> = 6%,<br>GHSV = 12000 h <sup>-1</sup> , flow rate 100<br>mL/min, SO <sub>2</sub> = 60 ppm (when used)<br>H <sub>2</sub> O = 8% (when used)  | 59%<br>(@100 °C) | 83%<br>(@200 °C, 700<br>min) | [8]       |
| FeMnW/TiO <sub>2</sub>    | NO = NH <sub>3</sub> = 600 ppm, O <sub>2</sub> = 15%,<br>GHSV = 240000 h <sup>-1</sup> , flow rate 150<br>mL/min                                                                           | 68%<br>(@100 °C) | No data                      | [9]       |



## References:

- [1] X. J. Yao, Y. Xiong Y, W. X. Zou, L. Zhang, S. G. Wu, X. Dong, F. Gao, Y. Deng, C. J. Tang, Z. Chen, L. Dong, Y. Chen, *Appl Catal B-Environ.*, 2014, **144**, 152-165.
- [2] B.Q. Jiang, Z.B. Wu, Y. Liu, S.C. Lee, W. K. Ho, *J. Phys. Chem. C.*, 2010, **114**, 4961-4965.
- [3] B.X. Shen, T. Liu, N. Zhao, X.Y. Yang, L.D. Deng, *J Envir Sci.*, 2010, **22**, 1447-1454.
- [4] G. Qi, R. T. Yang, *Appl Catal B-Environ.*, 2003, **44**, 217-225.
- [5] Y. Zhu, Y. Zhang, R. Xiao, T. Huang, K. Shen, *Catal. Commun.*, 2017, **88**, 64-67.
- [6] X. X. Hou, H. P. Chen, Y. H. Liang, X. Yang, Y. L. Wei, *Catal. Lett.*, 2020, **150**, 1041-1048.
- [7] F. M. Wang, B. X. Shen, S. W. Zhu, Z. Wang, *Fuel.*, 2019, **249**, 54-60.
- [8] S. Yang, F. Qi, S. Xiong, H. Dang, Y. Liao, P. K. Wong, J. Li, *Appl Catal B-Environ.*, 2016, **106**, 570-580.
- [9] J. Shi, Z. H. Zhang, M. X. Chen, Z. X. Zhang, W. F. Shang, *Fuel.*, 2017, **210**, 783-789.
